# Supplementary material
Source: publisher figshare collection journal article supplement (https://frontiersin.figshare.com/ndownloader/files/31009978)
Supplement: Supplementary file 1 [file 31009978]

Supplementary material

Table S1: Sequence alignment of 16S rRNA partial gene sequence (GenBank accession number MH523586) obtained from Indian River Lagoon water sample (IRL-2-27-2016) and the chloroplast genome sequence of *Aureoumbra lagunensis*. First nucleotide corresponds to position 103 in the *A. lagunensis* chDNA genome (GenBank accession number GQ231542.1). Asterisks indicate where sequence match begins and ends.

| Sequence name | Nucleotides |
| --- | --- |
| IRL_2-27-2016 GQ231542.1    IRL_2-27-2016  GQ231542.1    IRL_2-27-2016  GQ231542.1    IRL_2-27-2016  GQ231542.1  IRL_2-27-2016  GQ231542.1    IRL_2-27-2016  GQ231542.1  IRL_2-27-2016  GQ231542.1    IRL_2-27-2016  GQ231542.1  IRL_2-27-2016  GQ231542.1    IRL_2-27-2016  GQ231542.1    IRL_2-27-2016  GQ231542.1    IRL_2-27-2016  GQ231542.1 | --**C**GTGAGAATCTGCCCGTAGGAAGGAAATAACGCCGGGAAACTGGTGCT  CA**C**GTGAGAATCTGCCCGTAGGAAGGAAATAACGCCGGGAAACTGGTGCT  *****  AAAGTCCTATATACCTTTTGGTGAAATAGAGAAATCTGCCTACGGAGGAG  AAAGTCCTATATACCTTTTGGTGAAATAGAGAAATCTGCCTACGGAGGAG    CTCGCGCCTGATTAGCTAGTTGGTAGGGTAAAGGCCTACCAAGGCGATGA  CTCGCGCCTGATTAGCTAGTTGGTAGGGTAAAGGCCTACCAAGGCGATGA    TCAGTAGCTGATTTGAGAGGATGATCAGCCACACTGGAACTGAGACACGG  TCAGTAGCTGATTTGAGAGGATGATCAGCCACACTGGAACTGAGACACGG    TCCAGACTCCTACGGGAGGCAGCAGTGAGGAATTTTCCGCAATGGGCGAA  TCCAGACTCCTACGGGAGGCAGCAGTGAGGAATTTTCCGCAATGGGCGAA    AGCCTGACGGAGCAATACCGCGTGAGGGATGACGGCCTTCGGGTTGTAAA  AGCCTGACGGAGCAATACCGCGTGAGGGATGACGGCCTTCGGGTTGTAAA  CCTCTTTTTTCAGGGAGGAAGTTCTGACGTGTACCTGAAGAATAAGCATC  CCTCTTTTTTCAGGGAGGAAGTTCTGACGTGTACCTGAAGAATAAGCATC    GGCTAACTCCGTGCCAGCAGCCGCGGTAAGACGGAGGATGCAAGTGTTAT  GGCTAACTCCGTGCCAGCAGCCGCGGTAAGACGGAGGATGCAAGTGTTAT    CCGGAATTATTGGGCGTAAAGCGTCTGTAGGTTGTTTAATAAGTCTGTTG  CCGGAATTATTGGGCGTAAAGCGTCTGTAGGTTGTTTAATAAGTCTGTTG    TTAAAGGTTAAAGCTCAACTTTAAAACTGCAATAGATACTGTTAGGCTAG  TTAAAGGTTAAAGCTCAACTTTAAAACTGCAATAGATACTGTTAGGCTAG    AGTATAGTCGAGGTAGAAGGAATTTCCAGTGAAGCGGTGAAATGCGTAGA  AGTATAGTCGAGGTAGAAGGAATTTCCAGTGAAGCGGTGAAATGCGTAGA  *****  TATTGGAAGGAACACCAATGGCGAA**A**------------------------  TATTGGAAGGAACACCAATGGCGAA**A**GCATTCTACTAGGCTCTTACTGAC |
